# Supplementary material for: Enhancing the photocatalytic hydrogen production performance of CdS by introducing a co-catalyst CoTPPBr4 (7,8,17,18-tetrabromo-5,10,15,20-tetraphenylporphyrin)
Source: Royal Society of Chemistry journal article supplement (doi:10.1039/d4nj00372a), 2024-01-01
Supplement: d4nj00372a1.pdf [file d4nj00372a1.pdf]

## Supporting Information

### Enhancing the Photocatalytic Hydrogen Production Performance of CdS by Introducing Co-catalyst CoTPPBr<sub>4</sub> (7,8,17,18- Tetrabromo-5,10,15,20-tetraphenylporphyrin)

Zong Wang<sup>a</sup>, Xinxin Wang<sup>a,b</sup>, Kelai Chen<sup>a</sup>, Haojun Yin<sup>a</sup>, Huangsheng Su<sup>a</sup>, Yundang Wu<sup>b</sup>,

Chunlin Ni<sup>a,\*</sup>, Wei Liu<sup>a,\*</sup>

<sup>a</sup> College of Materials and Energy, South China Agricultural University, Guangzhou 510642, China

<sup>b</sup> National-Regional Joint Engineering Research Center for Soil Pollution Control and Remediation in South China, Guangdong Key Laboratory of Integrated Agro-environmental Pollution Control and Management, Institute of Eco-environmental and Soil Sciences, Guangdong Academy of Sciences, Guangzhou 510650, China

\* Corresponding author. Chunlin Ni, Wei Liu

Tel.: +86 20 87025180; Fax: +86 20 87024123.

E-mail: [niclchem@scau.edu.cn](mailto:niclchem@scau.edu.cn), [liuwei97@scau.edu.cn](mailto:liuwei97@scau.edu.cn)

**Table S1** Comparison between the materials prepared in this study and those reported in literature.

| Photocatalyst | Co-catalysts                                              | Sacrificial reagent                                             | Light source                       | Activity (mmol h <sup>-1</sup> g <sup>-1</sup> ) | Ref.      |
|---------------|-----------------------------------------------------------|-----------------------------------------------------------------|------------------------------------|--------------------------------------------------|-----------|
| CdS           | Cd-TCPP                                                   | TEOA                                                            | 300 W Xe lamp( $\lambda > 420$ nm) | 3.15                                             | 1         |
| CdS           | Fe-MOF-525 <sub>2,3</sub>                                 | TEOA                                                            | 300 W Xe lamp( $\lambda > 420$ nm) | 3.638                                            | 2         |
| CdS           | Ni <sub>2</sub> P                                         | 0.35 M Na <sub>2</sub> S/0.25 M Na <sub>2</sub> SO <sub>3</sub> | 300 W Xe lamp( $\lambda > 420$ nm) | 16.02                                            | 3         |
| CdS           | ZnO/ZnS                                                   | 0.35 M Na <sub>2</sub> S/0.25 M Na <sub>2</sub> SO <sub>3</sub> | 300 W Xe lamp( $\lambda > 420$ nm) | 2.64                                             | 4         |
| CdS           | CoP                                                       | 0.35 M Na <sub>2</sub> S/0.25 M Na <sub>2</sub> SO <sub>3</sub> | 300 W Xe lamp( $\lambda > 420$ nm) | 15.74                                            | 5         |
| CdS           | MoS <sub>2</sub> /Ti <sub>3</sub> C <sub>2</sub>          | Lactic acid                                                     | 300 W Xe lamp                      | 14.1                                             | 6         |
| CdS NRs       | 25-CDs                                                    | 0.5 M Na <sub>2</sub> S/0.5 M Na <sub>2</sub> SO <sub>3</sub>   | 300 W Xe lamp                      | 1.076                                            | 7         |
| CdS           | Sr <sub>2</sub> MgSi <sub>2</sub> O <sub>7</sub> :(Eu,Dy) | 0.35 M Na <sub>2</sub> S/0.25 M Na <sub>2</sub> SO <sub>3</sub> | 300 W Xe lamp                      | 18.07                                            | 8         |
| CdS           | ZnNi-C                                                    | 0.35 M Na <sub>2</sub> S/0.25 M Na <sub>2</sub> SO <sub>3</sub> | LED lamp( $\lambda > 420$ nm)      | 15.7                                             | 9         |
| CdS           | Pyr-GDY-CeO <sub>2</sub> -15%                             | Lactic acid                                                     | PCX-50B                            | 21.16                                            | 10        |
| CdS           | NiWO <sub>4</sub>                                         | Lactic acid                                                     | 300 W Xe lamp( $\lambda > 420$ nm) | 26.43                                            | 11        |
| CdS           | CoTPPBr <sub>4</sub>                                      | Lactic acid                                                     | 300 W Xe lamp                      | 41.3                                             | This work |

1. W. Xu, J. Wang, H. Yu, P. Liu, G.R. Zhang, H. Huang and D. Mei, *Appl. Catal. B-Environ*, 2022, **308**, 121218.
2. Y. Wu, Y. Qu, C. Su, X. Yang, Y. Yang, Y. Zhang and W. Huang, *Inorg. Chem.*, 2023, **62**, 21290-21298.
3. W. Ma, D. Zheng, B. Xiao, Y. Xian, Q. Zhang, S. Wang, J. Liu, P. Wang and X. Hu, *J. Environ. Chem. Eng.*, 2022, **10**, 107822.
4. K. He, *Int. J. Hydrogen Energy*, 2024, **51**, 30-40.
5. Y. Zou, C. Guo, X. Cao, L. Zhang, T. Chen, C. Guo and J. Wang, *J. Environ. Chem. Eng.*, 2021, **9**, 106270.
6. Y. Wang, C. Liu, C. Kong and F. Zhang, *Colloid Surface A*, 2022, **652**, 129746.
7. M. Ge, H. Yin, W. Tian, H. Zhang, S. Li, S. Wang and Z. Chen, *J. Colloid Interface Sci.*, 2024, **660**, 147-156.
8. J. Wang, R. Pan, Z. Yuan, Q. Hao, X. Niu, R. Wang, J. Ye, H. Y. Yang and Y. Wu, *Chem. Eng. J.*, 2024, **481**, 148296.
9. L. Xue, Y. Shi, C. Huang, Q. Wu, B. Chen and W. Yao, *J. Colloid Interface Sci.*, 2023, **635**, 72-82.
10. Y. Liu, Z. Fan, Y. Sun, X. Guo and Z. Jin, *ACS Appl. Energy Mater.*, 2023, **6**, 9743-9755.
11. X.L. Yin, L.L. Li, G.M. Gao, Y. Lu, Q.Q. Shang, H.T. Zhao, D.C. Li and J.M. Dou, *Int. J. Hydrogen Energy*, 2022, **47**, 9895-9904.

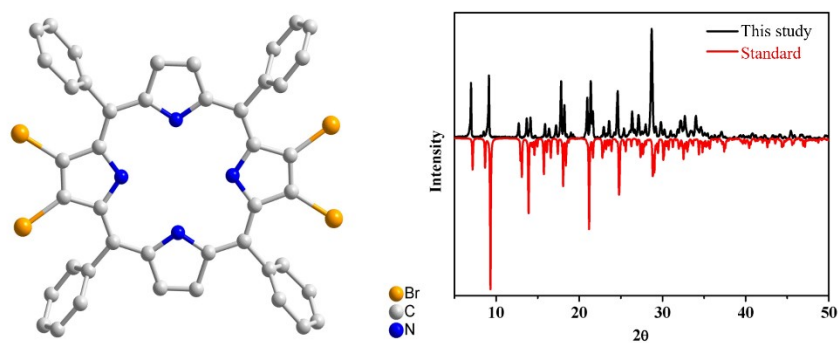

**Figure S1.** The structure, standard XRD spectrum, and XRD data obtained for  $\text{H}_2\text{TPPBr}_4$  in this study.

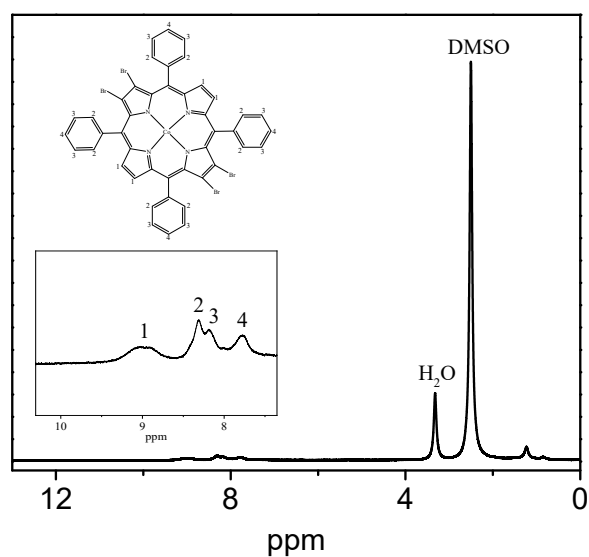

**Figure S2.** The NMR hydrogen spectrum data of  $\text{CoTPPBr}_4$ .

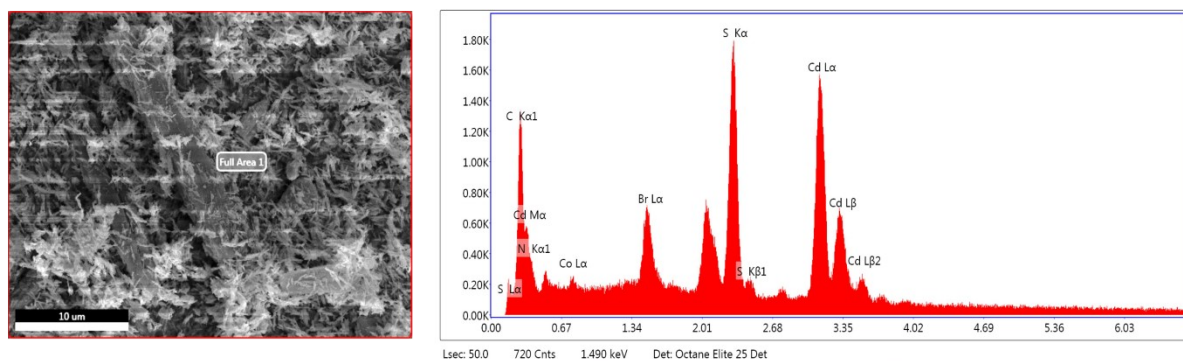

| Element | Weight % | Atomic % | Error % |
|---------|----------|----------|---------|
| C       | 14.63    | 49.47    | 10.16   |
| N       | 0.43     | 1.23     | 49.01   |
| Co      | 0.64     | 0.44     | 30.63   |
| Br      | 5.55     | 2.82     | 6.59    |
| S       | 19.41    | 24.59    | 4.02    |
| Cd      | 59.35    | 21.45    | 4.72    |

**Figure S3.** Energy dispersive X-ray spectroscopy (EDX) analysis of the composite.

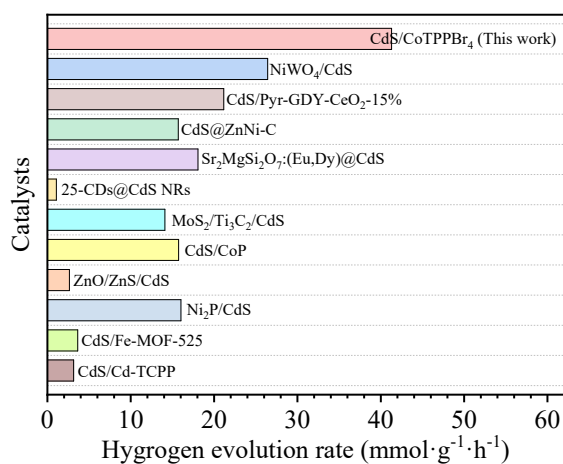

**Figure S4.** Comparison between the materials prepared in this study and those reported in literature.

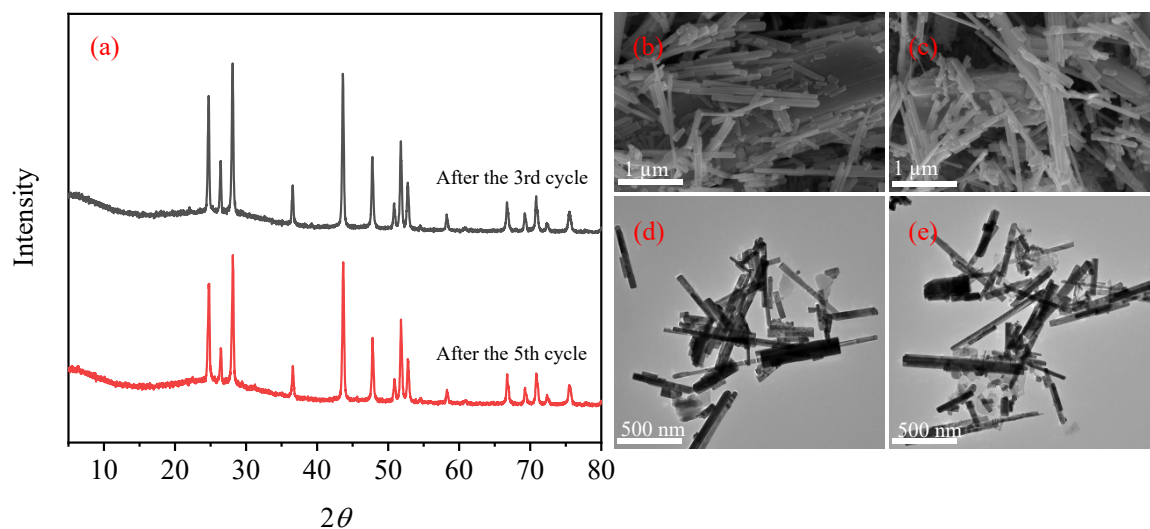

**Figure S5.** The XRD, SEM, and TEM characterization of the materials after 3 and 5 cycles of reaction. (a) XRD; (b) SEM after 3 cycles; (c) SEM after 5 cycles; (d) TEM after 3 cycles; (e) TEM after 5 cycles.

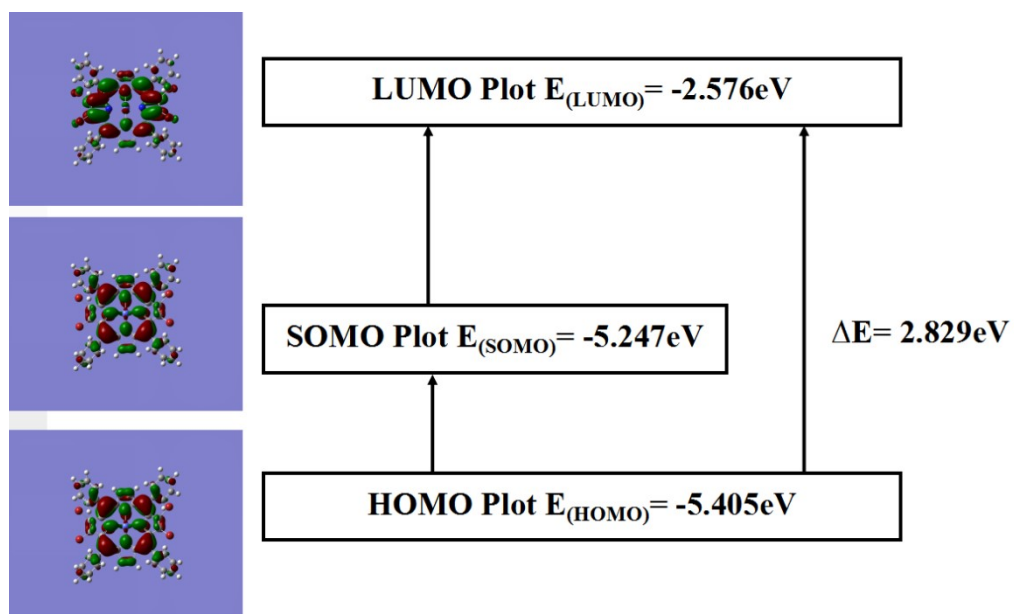

**Figure S6** The DFT calculation of the CoTPPBr<sub>4</sub>
